# Supplementary material for: A histidine-functionalized ROS scavenging hybrid nanozyme for therapeutic application in Parkinson's disease pathogenesis
Source: Royal Society of Chemistry journal article supplement (doi:10.1039/d3ma00743j), 2024-01-01
Supplement: d3ma00743j1.pdf [file d3ma00743j1.pdf]

Blot 1

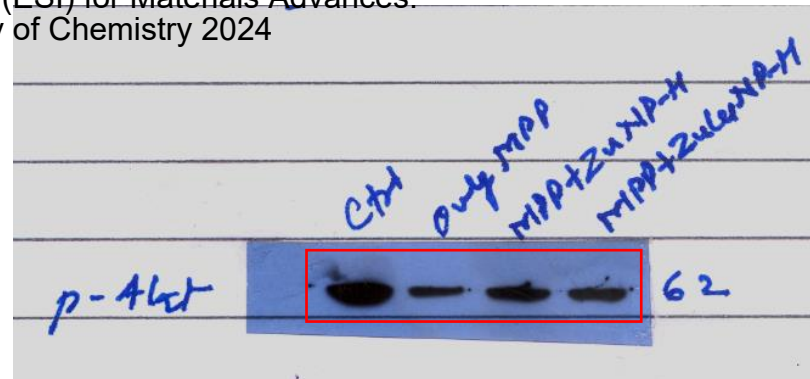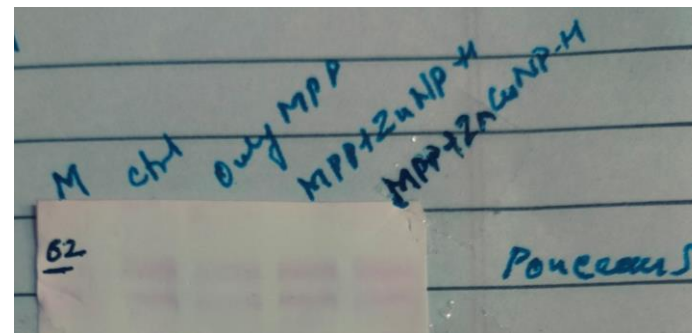

Blot 2

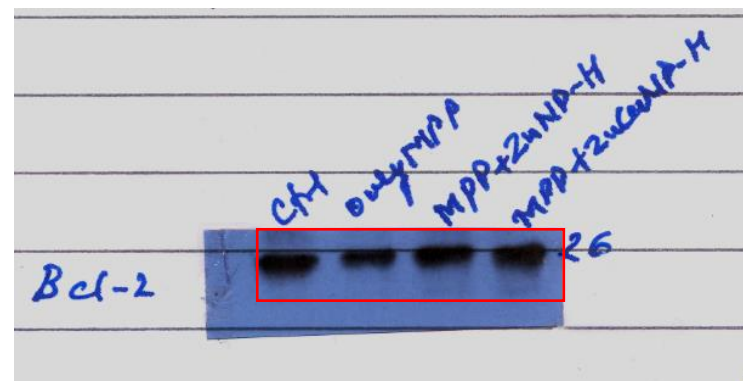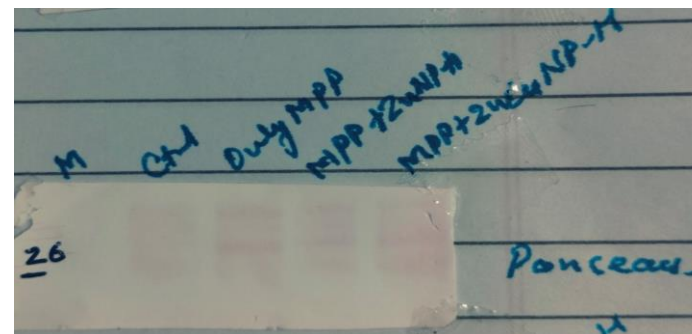

Blot 3

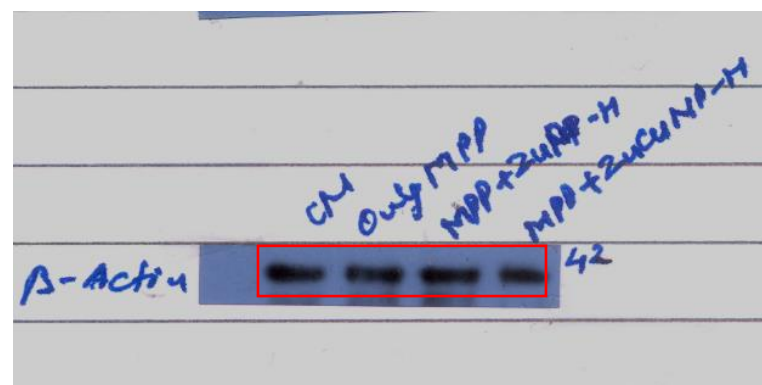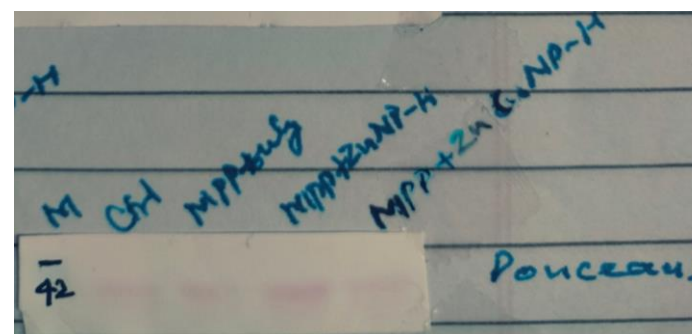

Raw uncropped western blots of **Figure. S14 A** with corresponding blot stained with ponceau S for molecular weight marker. Region highlighted (**red box**) in the blots 1,2, and 3 was used in making figures of S14A in the manuscript.
